# Supplementary material for: Tpbpa mediated deletion of Tfap2c leads to deregulation of MAPK, P21, AKT and subsequent placental growth arrest
Source: Oxford University Press journal article supplement (doi:10.1242/dev.128553), 2016-01-01
Supplement: dev128553supp.pdf [file dev128553supp.pdf]

## Supplementary Experimental procedure

### *Tissue preparation, Histology and Immunohistochemistry*

Embryos and placentae were harvested in ice cold 1x Phosphate buffered saline (PBS) from timed mating and fixed in 4% paraformaldehyde/PBS overnight at 4°C. Tissues were washed with PBS thrice and cut into two halves for paraffin and cryo embedding. For paraffin embedding, tissues were dehydrated through a graded ethanol series and embedded as paraffin blocks. 4 µm sections were cut and processed for histology and IHC. For cryo sections, tissues were incubated overnight at 4°C in 10% and 25% sucrose respectively followed by freezing in OCT in dry ice. Blocks were stored at -80°C and 10 µm sections were cut on Superfrost slides for in situ hybridization (ISH). Histological sections were stained with Hematoxylin and Eosin (H/E) using standard protocol. IHC was performed as published previously (Kuckenberget al., 2010). 4 µm hydrated deparaffinized paraffin sections following antigen retrieval were incubated with primary antibody against Tfap2c (1:250; sc53162-6E4/4, Santa Cruz), Ki-67(1:250; TEC-3, DAKO, Germany), CD-31(1:20; SZ31, Dianova, Germany), pERK1/2(1:50, #4370 cell signaling), and pAKT(1:50,# 4060, cell signaling) overnight at 4 °C. Anti-rabbit (1:500; DAKO, Hamburg, Germany) and anti-rat (1:200; DAKO) secondary antibodies were used for 30 minutes at room temperature. Signals were visualized using a Vectastain ABC kit (Vector Laboratories, Germany). Sections were photographed using Diskus software (Hilden, Germany).

### *ISH*

Briefly, sections were rehydrated in 1x PBS, fixed in 4% PFA and incubated with 30µg/ml Proteinase K for 10 minutes at 37°C. Each step was followed by careful washing with PBS for 5 minutes each. Sections were hybridized overnight with DIG labeled probes (2ng/µl) at 65°C. Following day, sections were washed, incubated with RNaseA and subsequently blocked for an hour at room temperature, incubated with anti-DIG antibody conjugated to alkaline phosphatase (1:2000; Roche, Mannheim, Germany) at 4°C overnight. Sections were washed, developed and counter stained with NuclearFastRed (Sigma, Germany) and mounted with Entellan (Merck, Germany).

### *TUNEL*

Cryo sections were fixed in 4%PFA for 15 minutes and incubated with 20 µg/ml of proteinase K for 15 minutes and washed with PBS. For positive control, sections were treated with DNase 1 for 15 minutes and rinsed with PBS. The sections were incubated with equilibration buffer for 5–10 minutes following incubation with rTdT (Terminal Deoxynucleotidyl Transferase, Recombinant) reaction mix including rTdT enzyme and biotinylated nucleotide mix in a humidified atmosphere at 37 °C for 1 hour. The sections were further washed with 2× SSC for 15 minutes at room temperature. The endogenous peroxidase activity was blocked with 0.3% hydrogenperoxide followed by subsequent washing step in PBS thrice for 5 minutes each. The sections were then incubated with Streptavidin HRP for 30 minutes and staining was done with diaminobenzidine followed by washing and mounting the sections.

### *Laser microdissection*

10 µm sections were cut with a cryomicrotome (Leica CM 1850 UV, Germany) and collected on membrane coated glass slides (Membrane Slides 1.0 PEN, Zeiss, Germany). The samples were fixed at -20° C with Ethanol and stained with Cresyl violet (Merck, Germany) according to the manufacturer's instructions. For preservation and improving the visualization of the tissue under the microscope, the sections were mounted with Liquid Cover Glass (Zeiss, Germany). Laser Microdissection was performed with the PALM MicroBeam System (Zeiss, Germany) with an Axiovert microscope (Zeiss, Germany). The software used was PALM RoboSoftware 4.2 (Zeiss, Germany).

### *Western Blot*

For protein analysis, 25 µg of protein was run on a 10% SDS-PAGE and transferred onto a nitrocellulose membrane. Primary antibodies were used to detect TFAP2C (1:500, 6E4/4 sc-53162, Santa Cruz), pERK1/2 (1:1000, #4370, cell signaling), ERK1/2 (1:1000, #9102, cell signaling), pP38 (1:1000, #9211, cell signaling), P38 (1:1000, #9212, cell signaling), pAKT (1:1000, #4060, cell signaling), AKT (1:1000, #4691, cell signaling) and B-ACTIN (1:50000; AC-15, Sigma Aldrich).

HRP conjugated secondary antibodies were used (anti-mouse 1:1000; anti rabbit 1:2000, DAKO) and the membrane was incubated with Pierce- Super Signal West Pico chemiluminescent substrate (Thermo scientific) and the signal was detected using ChemiDoc MP imaging system (BIO-RAD).

*Softwares:*

Web based GeneMANIA (Warde-Farley et al., 2010) ([www.genemania.org](http://www.genemania.org)), String (Jensen et al., 2009) ([www.string-db.org](http://www.string-db.org)) and rVista algorithm (Loots and Ovcharenko, 2004) softwares were used.

## Supplementary figures

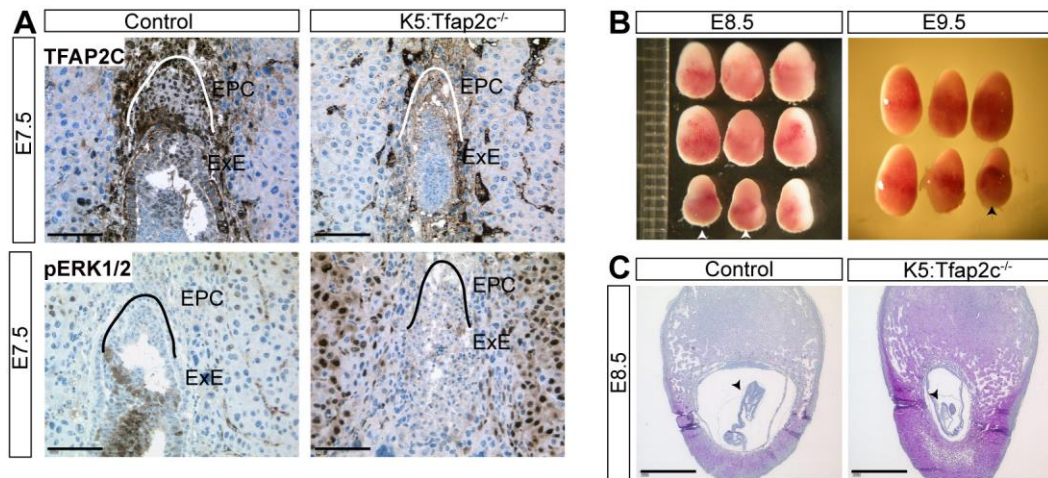

**Fig. S1: Smaller implantation in K5Cre:Tfap2c<sup>-/-</sup> placentae.** (A) IHC against TFAP2C and pERK1/2 at E7.5 placental sections of K5Cre:Tfap2c<sup>-/-</sup> and control. Scale bar- 100µm (B) Whole implantation isolated from K5Cre:Tfap2c<sup>-/-</sup> E8.5 and E9.5 respectively. Arrowheads show smaller K5Cre:Tfap2c<sup>-/-</sup> implantation. (C) H/E stained placentae of control and K5Cre:Tfap2c<sup>-/-</sup> at E8.5. Arrowheads indicate smaller embryo in K5Cre:Tfap2c<sup>-/-</sup>. Scale bar 1000µm.

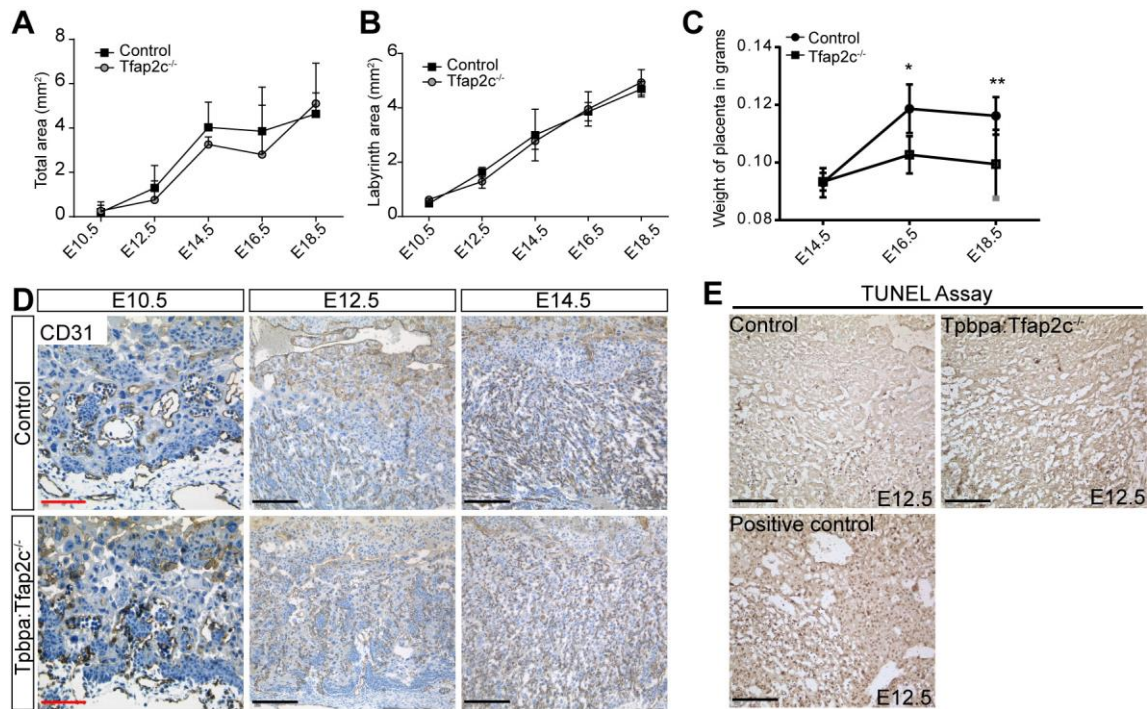

**Fig. S2: Analysis of *Tpbpa:Tfap2c<sup>-/-</sup>* placentae.** (A) Total area of the control and *Tpbpa:Tfap2c<sup>-/-</sup>* placentae at E10.5 (n=2 each), E12.5 (n=3 each), E14.5 (n=6 each), E16.5 (n=4 each) and E18.5 (n=6 each). (B) Labyrinth area of the control and *Tpbpa:Tfap2c<sup>-/-</sup>* placentae at E10.5 (n=2 each), E12.5 (n=3 each), E14.5 (n=6 each), E16.5 (n=4 each) and E18.5 (n=6 each). (C) Weight of *Tpbpa:Tfap2c<sup>-/-</sup>* and control placentae show lighter *Tpbpa:Tfap2c<sup>-/-</sup>* placenta at E16.5 (n=11 control, n=3 mutant) and E18.5 (n=13 control, n=7 mutant). (D) IHC against CD-31 on paraffin embedded sections at E10.5, E12.5 and E14.5 respectively in control and *Tpbpa:Tfap2c<sup>-/-</sup>* placentae. (E) TUNEL staining to detect apoptotic cells on cryo embedded E12.5 control and *Tpbpa:Tfap2c<sup>-/-</sup>* placentae with positive control. Black scale bar- 200  $\mu$ m, Red scale bar- 100  $\mu$ m. Data are represented as mean  $\pm$  SD. \*\*  $p \leq 0.005$ , \*  $p \leq 0.05$

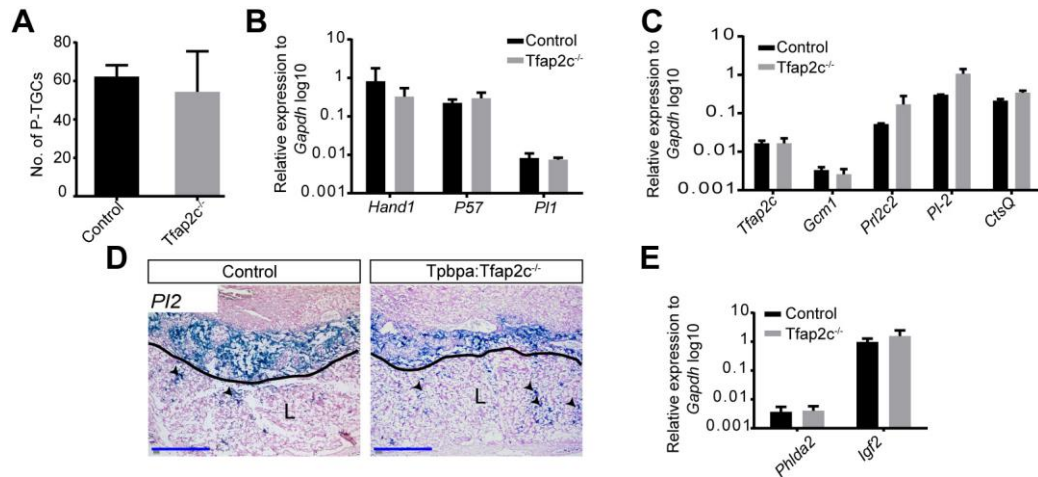

**Fig. S3: Analysis of JZ and labyrinth of Tpbpa:Tfap2c<sup>-/-</sup> placentae.** (A) Quantification of P-TGCs on E12.5 Tpbpa:Tfap2c<sup>-/-</sup> and control placentae by counting the number of P-TGCs on 3 different sections each. (B) Samples were obtained by laser microdissection of SpT from E14.5 Tpbpa:Tfap2c<sup>-/-</sup> and control placentae (n=4 each) and expression levels relative to *Gapdh* in log<sub>10</sub> scale were measured. *Hand1*, *p57* and *Pl1* did not show any deregulation compared to the control placentae. (C) Samples were obtained by laser microdissection of Labyrinth from E14.5 Tpbpa:Tfap2c<sup>-/-</sup> and control placentae (n=2 Tpbpa:Tfap2c<sup>-/-</sup> and n=3 control) and expression levels (relative to *Gapdh*, log<sub>10</sub> scale) of *Tfap2c*, *Gcm1*, *Prl2c2*, *Pl2* and *CtsQ* were measured. Increased expression of *Prl2c2* and *Pl2* is detected. (D) In situ hybridization on cryo embedded sections at E14.5 against *Pl2*. Arrows show increased number of *Pl2* positive cells in the labyrinth of Tpbpa:Tfap2c<sup>-/-</sup> placentae compared to the control. (E) Samples were obtained by laser microdissection of JZ from E14.5 Tpbpa:Tfap2c<sup>-/-</sup> and control placentae (n=3 each) and expression levels (relative to *Gapdh*, log<sub>10</sub> scale) of *Phlda2* and *Igf2* were measured. L- labyrinth, Blue scale bar- 500 μm. Data are represented as mean +/- SD.



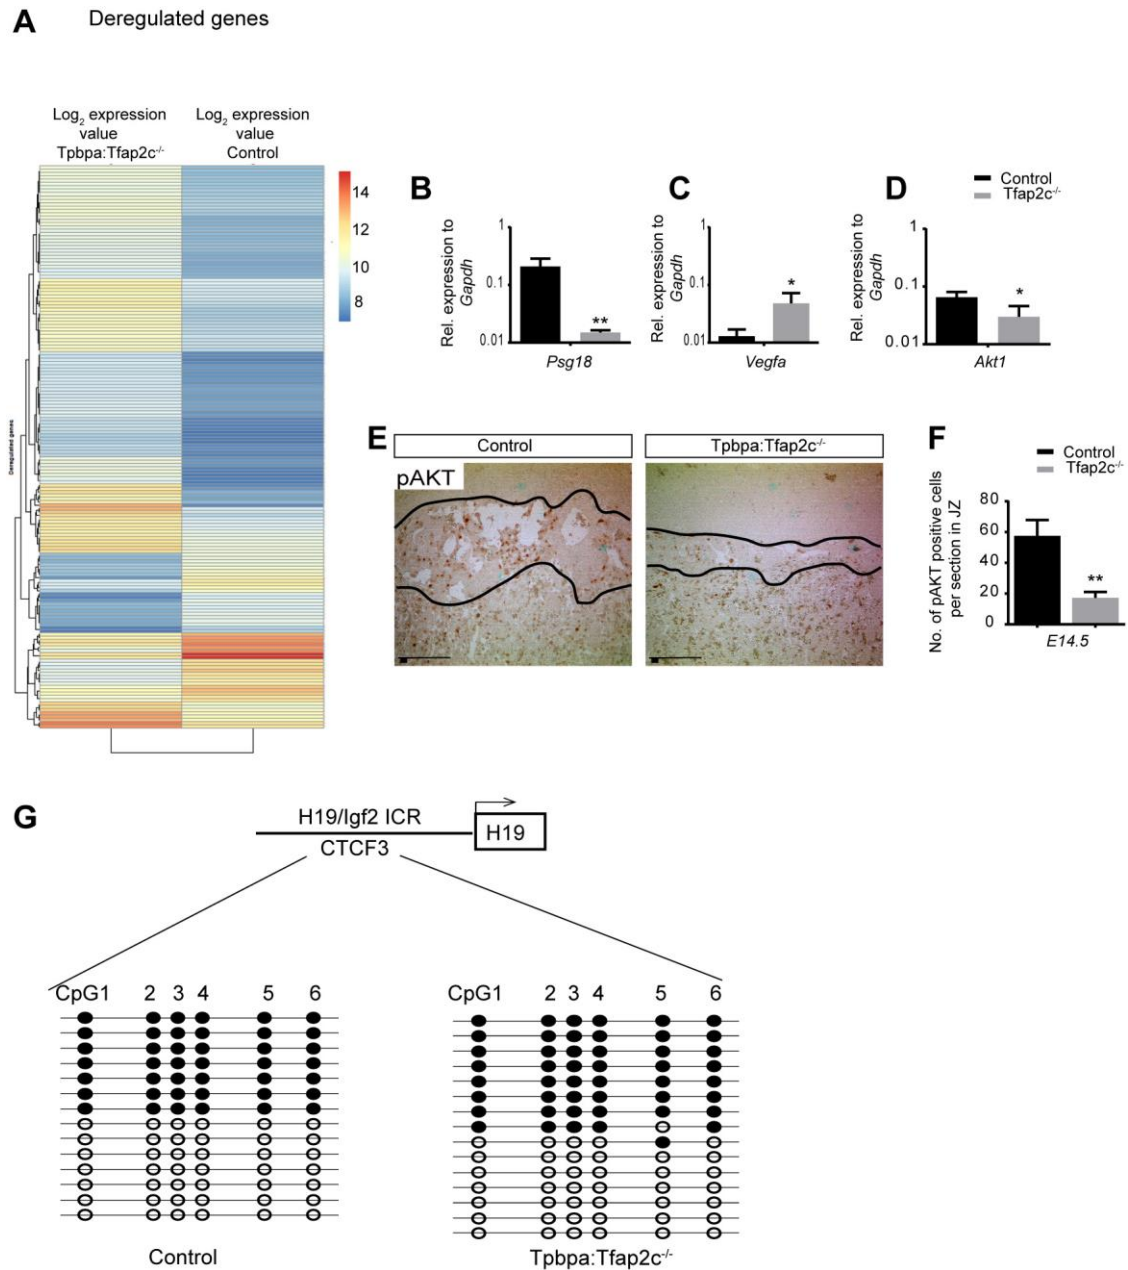

**Fig. S4: Validation of genes deregulated in the microarray analysis of laser microdissected JZ from control and *Tpbpa:Tfap2c*<sup>-/-</sup> placentae at E14.5.** (A) Heat map showing expression values of all deregulated genes in Log<sub>2</sub> scale in control and *Tpbpa:Tfap2c*<sup>-/-</sup> placentae. Log-transformed expression values are presented on a scale of 8 to 14. Upregulated genes are indicated in shades of red; downregulated in blue. (B) Samples were obtained by laser microdissection of SpT from E14.5 *Tpbpa:Tfap2c*<sup>-/-</sup> and control placentae (n=4 each) and expression levels relative to *Gapdh* were measured by qRT-PCR. Note significant downregulation of *Psg18*, (C) *Vegfa* and (D) *Akt1*. (E) IHC against pAKT on placental sections E14.5. (F) Quantification of pAKT positive cells. Three different high magnification areas were counted each. Data are represented as mean +/- SD. \*\* p ≤ 0.005, \* p ≤ 0.05. (G) Graphical representation of % methylation of CTCF3 region in H19 ICR domain in JZ of *Tpbpa:Tfap2c*<sup>-/-</sup> (n=15) and control placentae (n=16).

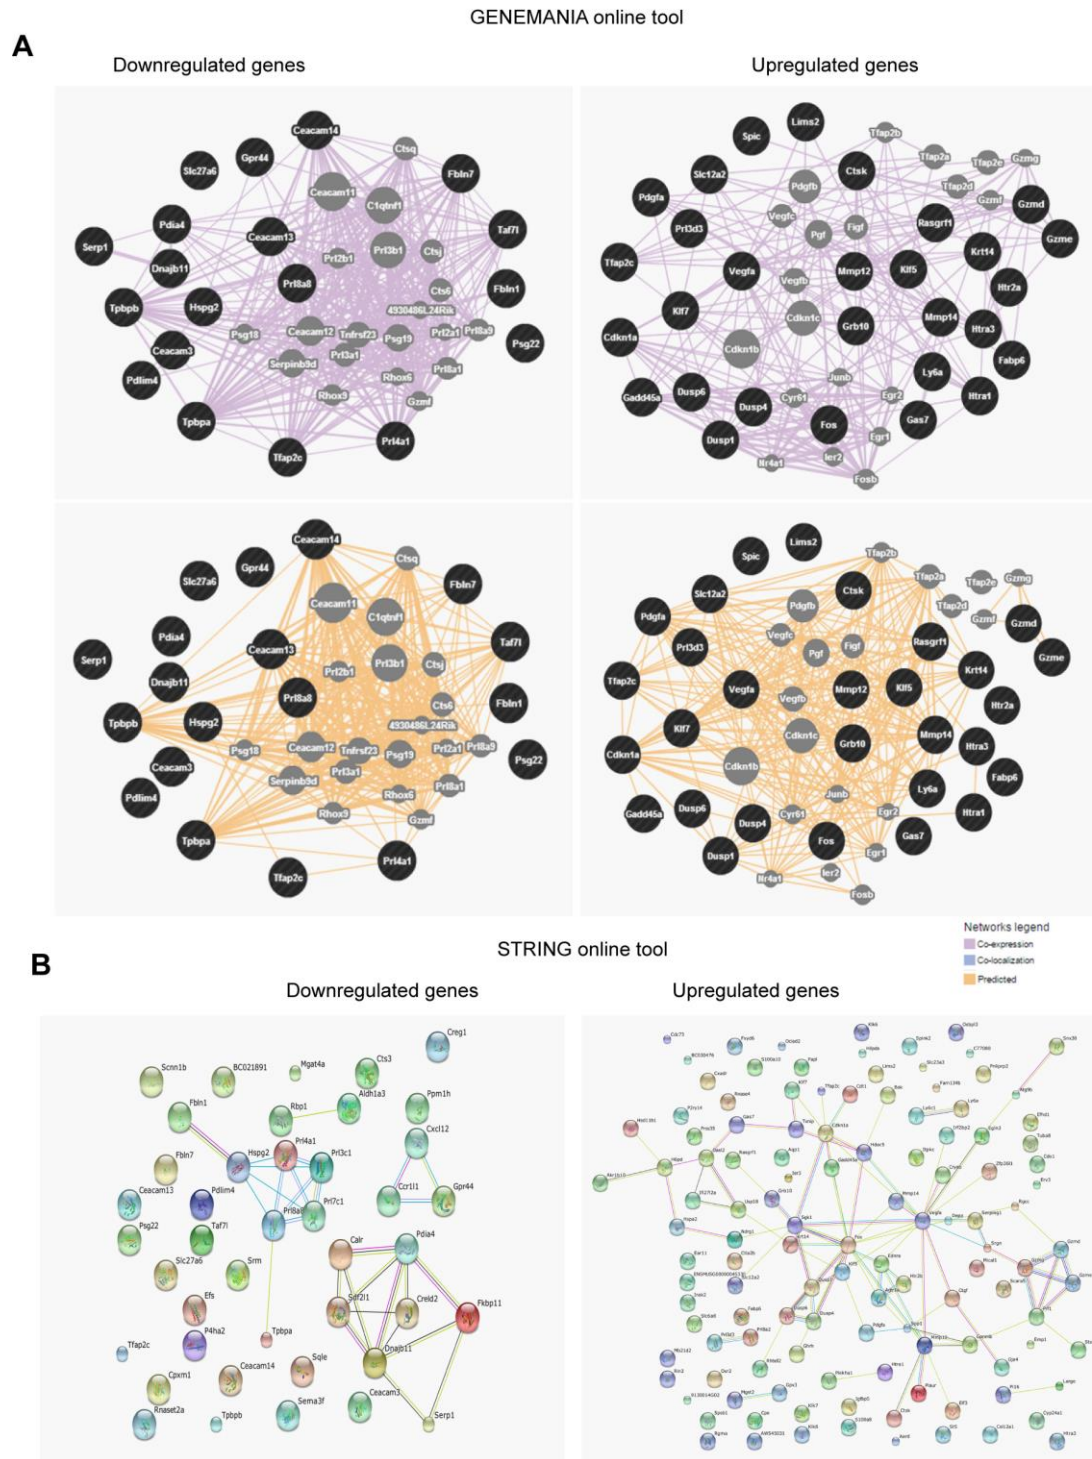

**Fig. S5: Interactive analysis of deregulated genes from expression microarray data.** (A) Interactive gene network analysis of up and downregulated genes using GENEMANIA online tool. Note linked co-expression of *Tfbp2c* and *Tfbpa* in downregulated genes. Purple lines indicate co-expression and orange lines indicate predicted interaction among the genes. (B) Interactive known and predicted protein- protein association using STRING online tool.



**Table S1: List of upregulated genes in the JZ of mutant placentae at E13.5**

**Table S2: List of downregulated genes in the JZ of mutant placentae at E13.5**

**Table S3: GO grouping of differentially regulated genes identified in murine placental JZ microarray analysis**

**Table S4: Deregulated genes with fold change and p value in qRT-PCR relative to the control**

**Table S5: Sequence of genotyping primers**

**Table S6: Gene name and sequences of primers used for quantitative RT-PCR and ChIP and Bisulfite sequencing**

**Table S7: shRNA oligonucleotide sequence**

**Table S1: List of genes upregulated in the JZ of mutant placentae**

**Gene symbol**                      **FC>1.5 (Log2)**

|                      |                 |
|----------------------|-----------------|
| <b>Osbpl3</b>        | <b>1.509086</b> |
| <b>C77080</b>        | 1.523591        |
| <b>H6pd</b>          | 1.526885        |
| <b>Prl3d3</b>        | 1.528163        |
| <b>Snx30</b>         | 1.531885        |
| <b>Slc6a8</b>        | 1.537295        |
| <b>Grb10</b>         | 1.542198        |
| <b>Slc12a2</b>       | 1.554466        |
| <b>Sgk1</b>          | 1.565943        |
| <b>Plaur</b>         | 1.567605        |
| <b>Rhbdl2</b>        | 1.575135        |
| <b>Mmp14</b>         | 1.575289        |
| <b>Ly6c1</b>         | 1.578245        |
| <b>4933402E13Rik</b> | 1.578724        |
| <b>LOC385615</b>     | 1.58095         |
| <b>Rasgrf1</b>       | 1.588314        |
| <b>Atg9b</b>         | 1.589724        |
| <b>Gzmd</b>          | 1.594451        |
| <b>Cdt1</b>          | 1.595864        |
| <b>4732462B05Rik</b> | 1.596131        |
| <b>Ndrg1</b>         | 1.599179        |
| <b>Rnase4</b>        | 1.602184        |
| <b>Hspa2</b>         | 1.60634         |
| <b>Cdo1</b>          | 1.607689        |
| <b>Plekha1</b>       | 1.608894        |
| <b>Oasl2</b>         | 1.612556        |
| <b>Irak2</b>         | 1.615824        |
| <b>Cxadr</b>         | 1.624538        |
| <b>Prf1</b>          | 1.657681        |
| <b>2310005E10Rik</b> | 1.657707        |
| <b>Gadd45a</b>       | 1.670023        |
| <b>Irf2bp2</b>       | 1.676604        |

|                      |          |
|----------------------|----------|
| <b>Irak2</b>         | 1.67875  |
| <b>Aqp1</b>          | 1.705648 |
| <b>Cdc73</b>         | 1.706444 |
| <b>Egln3</b>         | 1.707686 |
| <b>Elf3</b>          | 1.711483 |
| <b>Tuba8</b>         | 1.721988 |
| <b>Htr2b</b>         | 1.725925 |
| <b>Cyp24a1</b>       | 1.72717  |
| <b>Usp18</b>         | 1.72859  |
| <b>2310016C08Rik</b> | 1.734629 |
| <b>Large</b>         | 1.740121 |
| <b>Prl3d3</b>        | 1.740349 |
| <b>Cdkn1a</b>        | 1.741578 |
| <b>Spsb1</b>         | 1.743703 |
| <b>Ociad2</b>        | 1.746128 |
| <b>St5</b>           | 1.747912 |
| <b>Itpkc</b>         | 1.751357 |
| <b>1600021P15Rik</b> | 1.773339 |
| <b>Ndr1</b>          | 1.775981 |
| <b>Klf5</b>          | 1.782944 |
| <b>Klf7</b>          | 1.783327 |
| <b>Gzme</b>          | 1.784651 |
| <b>Mical1</b>        | 1.785555 |
| <b>1600014E20Rik</b> | 1.789272 |
| <b>Fxyd6</b>         | 1.790198 |
| <b>BC030476</b>      | 1.790865 |
| <b>Serping1</b>      | 1.798993 |
| <b>Srgn</b>          | 1.807363 |
| <b>Gzmd</b>          | 1.825638 |
| <b>St5</b>           | 1.839717 |
| <b>B230343A10Rik</b> | 1.84686  |
| <b>Dusp4</b>         | 1.84861  |
| <b>Dusp6</b>         | 1.860065 |
| <b>Rasgrf1</b>       | 1.870452 |
| <b>Gpnmb</b>         | 1.87048  |
| <b>Ctgf</b>          | 1.873728 |
| <b>Aard</b>          | 1.893147 |
| <b>Bok</b>           | 1.898854 |
| <b>Spp1</b>          | 1.904676 |
| <b>Klk7</b>          | 1.9048   |
| <b>Osr2</b>          | 1.905259 |
| <b>Stx11</b>         | 1.914442 |
| <b>Klf7</b>          | 1.915583 |
| <b>Zfp3611</b>       | 1.918171 |
| <b>Prss35</b>        | 1.924599 |
| <b>S100a10</b>       | 1.931051 |

|                          |          |
|--------------------------|----------|
| <b>Ghrh</b>              | 1.937728 |
| <b>Hsd11b1</b>           | 1.938285 |
| <b>Hsd11b1</b>           | 1.95428  |
| <b>P2ry14</b>            | 1.955215 |
| <b>Cpe</b>               | 1.96212  |
| <b>C330005M16Rik</b>     | 1.968196 |
| <b>Osbp13</b>            | 1.969108 |
| <b>Cryab</b>             | 1.970954 |
| <b>Txnip</b>             | 1.975591 |
| <b>Hdac5</b>             | 1.986672 |
| <b>Ly6a</b>              | 1.991316 |
| <b>Slc23a3</b>           | 1.998663 |
| <b>S100a8</b>            | 2.016638 |
| <b>Hsd11b1</b>           | 2.021868 |
| <b>Gas7</b>              | 2.026153 |
| <b>Fabp6</b>             | 2.048584 |
| <b>Lims2</b>             | 2.066802 |
| <b>Klf7</b>              | 2.068018 |
| <b>Txnip</b>             | 2.088046 |
| <b>Ier3</b>              | 2.090304 |
| <b>Pi16</b>              | 2.099015 |
| <b>Ear11</b>             | 2.104489 |
| <b>Ctgf</b>              | 2.116343 |
| <b>Dusp1</b>             | 2.116575 |
| <b>Htra1</b>             | 2.117235 |
| <b>Vegfa</b>             | 2.124982 |
| <b>Klk6</b>              | 2.130946 |
| <b>Scara5</b>            | 2.135991 |
| <b>Mgst2</b>             | 2.147432 |
| <b>Ctsk</b>              | 2.156731 |
| <b>Mmp12</b>             | 2.160021 |
| <b>Rgma</b>              | 2.161246 |
| <b>Efhd1</b>             | 2.180658 |
| <b>Prl3d3</b>            | 2.183273 |
| <b>Pdgfa</b>             | 2.187754 |
| <b>Gpx3</b>              | 2.191067 |
| <b>Rin2</b>              | 2.23222  |
| <b>4930486L24Rik</b>     | 2.254293 |
| <b>Htra3</b>             | 2.256029 |
| <b>Gzmg</b>              | 2.275722 |
| <b>Pnliprp2</b>          | 2.285754 |
| <b>Prl8a2</b>            | 2.363383 |
| <b>Htra1</b>             | 2.425347 |
| <b>scl0001849.1_2273</b> | 2.436885 |
| <b>Dusp4</b>             | 2.460281 |
| <b>Krt14</b>             | 2.473251 |

|                      |          |
|----------------------|----------|
| <b>Lims2</b>         | 2.612874 |
| <b>8430408G22Rik</b> | 2.622677 |
| <b>Gas7</b>          | 2.630254 |
| <b>Igfbp5</b>        | 2.639024 |
| <b>Prss18</b>        | 2.656949 |
| <b>Agtr1a</b>        | 2.661501 |
| <b>Lims2</b>         | 2.697922 |
| <b>Ednra</b>         | 2.761526 |
| <b>4930539E08Rik</b> | 3.055416 |
| <b>Gja4</b>          | 3.132141 |
| <b>Col12a1</b>       | 3.140382 |
| <b>Fos</b>           | 3.192744 |
| <b>Ctla2b</b>        | 3.2266   |
| <b>Pnliprp2</b>      | 3.275906 |
| <b>Igfbp5</b>        | 3.32744  |
| <b>1190002H23Rik</b> | 3.392156 |
| <b>Igfbp5</b>        | 3.461613 |
| <b>Fam134b</b>       | 3.552477 |
| <b>Ifi27</b>         | 4.147568 |
| <b>Emp1</b>          | 4.181227 |
| <b>Klk8</b>          | 4.650642 |
| <b>Spink2</b>        | 5.626195 |

**Table S2:** List of genes downregulated in the JZ of mutant placentae

| Gene symbol          | FC>1.5 (Log2)   |
|----------------------|-----------------|
| <b>eGFP</b>          | <b>-3.77727</b> |
| <b>Cts3</b>          | <b>-3.7038</b>  |
| <b>LOC381852</b>     | <b>-3.06463</b> |
| <b>Prlpc3</b>        | <b>-2.88441</b> |
| <b>Creg1</b>         | <b>-2.73667</b> |
| <b>Ceacam13</b>      | <b>-2.68573</b> |
| <b>Fkbp11</b>        | <b>-2.58183</b> |
| <b>Ceacam14</b>      | <b>-2.52696</b> |
| <b>Ceacam13</b>      | <b>-2.41975</b> |
| <b>Creld2</b>        | <b>-2.37883</b> |
| <b>Calr</b>          | <b>-2.35118</b> |
| <b>Sdf211</b>        | <b>-2.32642</b> |
| <b>BC021891</b>      | <b>-2.28505</b> |
| <b>Sema3f</b>        | <b>-2.27968</b> |
| <b>Ceacam3</b>       | <b>-2.23943</b> |
| <b>Fbln7</b>         | <b>-2.22116</b> |
| <b>Creld2</b>        | <b>-2.20439</b> |
| <b>P4ha2</b>         | <b>-2.18194</b> |
| <b>Scnn1b</b>        | <b>-2.17906</b> |
| <b>Cxcl12</b>        | <b>-2.17149</b> |
| <b>Prl4a1</b>        | <b>-2.16109</b> |
| <b>C030002B11Rik</b> | <b>-2.13341</b> |
| <b>Sema3f</b>        | <b>-2.10653</b> |
| <b>Psg22</b>         | <b>-2.08036</b> |
| <b>Pdia4</b>         | <b>-2.02606</b> |
| <b>Ceacam14</b>      | <b>-2.00069</b> |
| <b>Prl3c1</b>        | <b>-1.97935</b> |
| <b>Aldh1a3</b>       | <b>-1.94388</b> |
| <b>Prl7c1</b>        | <b>-1.94014</b> |
| <b>P4ha2</b>         | <b>-1.92095</b> |
| <b>Tpbpb</b>         | <b>-1.90947</b> |
| <b>Dnajb11</b>       | <b>-1.86672</b> |
| <b>Pdlim4</b>        | <b>-1.85605</b> |
| <b>Efs</b>           | <b>-1.84588</b> |
| <b>Ccr11l</b>        | <b>-1.80664</b> |
| <b>9530018I07Rik</b> | <b>-1.7933</b>  |
| <b>Rbp1</b>          | <b>-1.67397</b> |
| <b>Fbln1</b>         | <b>-1.66694</b> |
| <b>Tpbpa</b>         | <b>-1.653</b>   |
| <b>Fbln1</b>         | <b>-1.63775</b> |
| <b>Hspg2</b>         | <b>-1.63722</b> |
| <b>Gpr44</b>         | <b>-1.61621</b> |
| <b>Slc27a6</b>       | <b>-1.59768</b> |



|                        |          |
|------------------------|----------|
| <b>LOC100044439</b>    | -1.59259 |
| <b>Sqle</b>            | -1.57135 |
| <b>Srm</b>             | -1.57097 |
| <b>scl0001259.1_60</b> | -1.55067 |
| <b>Cpxm1</b>           | -1.53658 |
| <b>Rnaset2</b>         | -1.52336 |
| <b>Taf7l</b>           | -1.5066  |
| <b>D3Ucla1</b>         | -1.50564 |

**Table S3:** GO grouping of differentially regulated genes identified in murine placental JZ microarray analysis

| #  | Category      | GO Reference | Expected | observed | False Discovery Rate (p-value) | Sub-Category                         |
|----|---------------|--------------|----------|----------|--------------------------------|--------------------------------------|
| 1  | Gene Ontology | GO:0005576   | 8.39952  | 42       | 5.62151e-17                    | extracellular region                 |
| 2  | Gene Ontology | GO:0008152   | 36.408   | 76       | 5.44931e-11                    | metabolic process                    |
| 3  | Gene Ontology | GO:0048731   | 11.5921  | 39       | 1.38595e-10                    | system development                   |
| 4  | Gene Ontology | GO:0009987   | 57.2054  | 98       | 1.54034e-10                    | cellular process                     |
| 5  | Gene Ontology | GO:0005488   | 51.9179  | 91       | 4.0732e-10                     | binding                              |
| 6  | Gene Ontology | GO:0048856   | 12.9115  | 40       | 4.0732e-10                     | anatomical structure development     |
| 7  | Gene Ontology | GO:0065008   | 7.4226   | 30       | 4.0732e-10                     | regulation of biological quality     |
| 8  | Gene Ontology | GO:0050896   | 13.3899  | 40       | 9.8153e-10                     | response to stimulus                 |
| 9  | Gene Ontology | GO:0005515   | 27.097   | 59       | 3.65362e-09                    | protein binding                      |
| 10 | Gene Ontology | GO:0007275   | 14.1754  | 40       | 4.22509e-09                    | multicellular organismal development |
| 11 | Gene Ontology | GO:0044238   | 31.5083  | 64       | 6.63305e-09                    | primary metabolic process            |
| 12 | Gene Ontology | GO:0048513   | 9.15991  | 30       | 2.55178e-08                    | organ development                    |
| 13 | Gene Ontology | GO:0032502   | 15.389   | 40       | 3.41949e-08                    | developmental process                |
| 14 | Gene Ontology | GO:0065007   | 35.7181  | 66       | 1.2802e-07                     | biological regulation                |
| 15 | Gene Ontology | GO:0019538   | 11.9749  | 33       | 2.06102e-07                    | protein metabolic process            |
| 16 | Gene Ontology | GO:0003824   | 24.6295  | 51       | 2.65436e-07                    | catalytic activity                   |
| 17 | Gene Ontology | GO:0043170   | 25.3748  | 52       | 2.65436e-07                    | macromolecule metabolic process      |
| 18 | Gene Ontology | GO:0005737   | 34.3031  | 63       | 3.27729e-07                    | cytoplasm                            |
| 19 | Gene Ontology | GO:0005623   | 72.7908  | 102      | 2.38784e-06                    | cell                                 |
| 20 | Gene Ontology | GO:0044464   | 72.7858  | 102      | 2.38784e-06                    | cell part                            |
| 21 | Gene Ontology | GO:0044237   | 30.7328  | 56       | 2.89122e-06                    | cellular metabolic process           |
| 22 | Gene Ontology | GO:0044424   | 49.108   | 76       | 7.79736e-06                    | intracellular part                   |
| 23 | Gene Ontology | GO:0005622   | 50.2914  | 77       | 8.59119e-06                    | intracellular                        |
| 24 | Gene Ontology | GO:0050789   | 33.5679  | 58       | 8.59119e-06                    | regulation of biological process     |

|    |               |            |         |     |             |                                          |
|----|---------------|------------|---------|-----|-------------|------------------------------------------|
| 25 | Gene Ontology | GO:0050794 | 31.9615 | 56  | 8.59119e-06 | regulation of cellular process           |
| 26 | Gene Ontology | GO:0032501 | 24.1763 | 46  | 1.03389e-05 | multicellular organismal process         |
| 27 | Gene Ontology | GO:0031323 | 13.8381 | 31  | 2.33533e-05 | regulation of cellular metabolic process |
| 28 | Gene Ontology | GO:0044444 | 21.2657 | 41  | 2.72158e-05 | cytoplasmic part                         |
| 29 | Gene Ontology | GO:0019222 | 14.7697 | 32  | 3.00647e-05 | regulation of metabolic process          |
| 30 | Gene Ontology | GO:0043226 | 41.9472 | 62  | 0.000397499 | organelle                                |
| 31 | Gene Ontology | GO:0043231 | 36.9065 | 56  | 0.000469096 | intracellular membrane-bounded organelle |
| 32 | Gene Ontology | GO:0043227 | 36.967  | 56  | 0.00047478  | membrane-bounded organelle               |
| 33 | Gene Ontology | GO:0043229 | 41.8264 | 60  | 0.0011161   | intracellular organelle                  |
| 34 | Gene Ontology | GO:0044260 | 22.3685 | 36  | 0.00267099  | cellular macromolecule metabolic process |
| 35 | Gene Ontology | GO:0023052 | 20.6463 | 31  | 0.0148365   | signaling                                |
| 36 | Gene Ontology | GO:0005575 | 147.822 | 143 | 0.0169492   | cellular_component                       |
| 37 | Gene Ontology | GO:0016020 | 37.3245 | 49  | 0.0214605   | membrane                                 |
| 38 | KEGG          | -          | 1.57107 | 8   | 0.000247678 | MAPK signaling pathway                   |

**Table S4:** Deregulated genes with p value in qRT-PCR related to Fig. 4C

| Gene     | Deregulated in Tpbpa:Tfap2c <sup>-/-</sup> placenta | Mean fold change | p-value |
|----------|-----------------------------------------------------|------------------|---------|
| Prl8a8   | Down                                                | 181.18           | <0.0001 |
| Prl3a1   | Down                                                | 20.74            | 0.022   |
| Tpbpa    | Down                                                | 20.49            | 0.0025  |
| Pcdh12   | Down                                                | 4.69             | 0.0019  |
| Gjb3     | Down                                                | 4.23             | 0.00016 |
| Pl1      | Unchanged                                           | 1.06             | ns      |
| Pl2      | Down                                                | 3.36             | 0.004   |
| Prl2c2   | Down                                                | 3.04             | 0.011   |
| Rgs5     | Down                                                | 4.58             | 0.003   |
| Pcsk6    | Down                                                | 2.76             | 0.024   |
| Tle3     | Unchanged                                           | 1.3              | ns      |
| CtsQ     | Unchanged                                           | 1.25             | ns      |
| P21      | Up                                                  | 3.34             | 0.00018 |
| H19      | Up                                                  | 2.11             | 0.03    |
| Tex 19.1 | Down                                                | 2.22             | 0.03    |
| Ascl2    | Down                                                | 8.19             | 0.00054 |
| Slc38a4  | Down                                                | 2.61             | <0.0001 |

**Table S5:** List of genotyping primers

| Primers   | Sequence 5'-3'              |
|-----------|-----------------------------|
| Cre F     | TAAAGATATCTCACGTA CTGACGGTG |
| Cre R     | TCTCTGACCAGAGTCATCCTTAGC    |
| Tfap2c P1 | AACAGGTTATCATTGGTTGGGATT    |
| Tfap2c P2 | CAATTTGTCCA ACTTCTCCCTCAA   |
| Tfap2c P3 | AATAGTCAGCCACCGCTTACTAGG    |



**Table S6:** Primer Sequences for quantitative RT-PCR, ChIP and bisulfate sequencing.

| Target name | Sequence 5'-3'                                        | Reference                      |
|-------------|-------------------------------------------------------|--------------------------------|
| Tfpap2c     | F: CCTGCTCAGCTCCACGTC<br>R: CCTCCATTTTTGGACTTTGC      |                                |
| Tpbpa       | F: CCAGCACAGCTTTGGACATCA<br>R: AGCATCCAACCTGCGCTTCA   |                                |
| Hand1       | F: CCCCTCTCCGTCCTCTTAC<br>R: CTGCGAGTGGTCACACTGAT     |                                |
| Ascl2       | F: GGTGACTCCTGGTGGACCTA<br>R: TCCGGAAGATGGAAGATGTC    |                                |
| Pl1         | F: TGGAGCCTACATTGTGGTGG<br>R: TGGCAGTTGGTTTGGAGGA     |                                |
| Pl2         | F: CCAACGTGTGATTGTGGTGT<br>R: TGCCACCATGTGTTTCAGAG    |                                |
| Prl2c2      | F: TGCTCCTGGATACTGCTCCTA<br>R: GGCTTGTTCCCTGTTTTCTGG  |                                |
| Gcm1        | F:CCATGTGAAACTGCCTCAGA<br>R: CTCCTCTGTGGAGCAGTCC      |                                |
| Pcdh12      | F: CTCCTGTCCAGCAAATCTCC<br>R: TCTGCTTGACCACTAGGCTTG   |                                |
| Gjb3        | F: CTCCTCTGCTGTGGGTCTTG<br>R: ATGCCGTGGAGTACTGGTTC    |                                |
| P21         | F: CCGTTGTCTCTTCGGTCCC<br>R: CATGAGCGCATCGCAATC       | (Choi et al., 2012)            |
| Prl3a1      | AGAGCGAAAGTGCATGTGTG<br>GCACCTCTGTTCCCTTCAG           | (Reichmann et al., 2013)       |
| Prl8a8      | AAATTATGTGGGTGCCTGGA<br>TCACGCAGAATTTGTCTGTTG         | (Reichmann et al., 2013)       |
| Rgs5        | F: AGGCCCTAAAGAGGTGAAC<br>R: GACGGTTCACCAGGTCTT       | (Mould et al., 2012)           |
| Pcsk6       | F: CCCAGGCAGAGACTCCAGAA<br>R: GGCACACACTGGTCTGTAAAGT  | (Mould et al., 2012)           |
| Tle3        | F: TGGTGAGCTTTGGAGCTGTT<br>R: CGGTTTCCCTCCAGGAAT      | (Villanueva et al., 2011)      |
| CtsQ        | F: GAGGCAGTAGTGGTCATCCC<br>R: CAGTACTTCTTCCTCCGACT    |                                |
| H19         | F: GAAATGGTGCTACCCAGCTCAT<br>R: TTCAGCTTCACCTTGGAGCAG | (Sferruzzi-Perri et al., 2009) |
| Tex19.1     | AAAATGGGCCACCCACATCTC<br>CCACTGGCCCTTGGACCAGAC        | (Reichmann et al., 2013)       |
| Slc38a4     | F: TGATTGGGATGTTAGTCTGAGG<br>R: GGCCTGGGTAAAATGTGTG   |                                |
| Psg18       | TGCAGGCAAACATTTTCAGAG<br>GAGTATGACAGGGGCCTCAA         | (Reichmann et al., 2013)       |
| Vefga       | F: GCACATAGAGAGAATGAGCTTCC<br>R: CTCCGCTCTGAACAAGGCT  | (Jo et al., 2010)              |
| Akt1        | F: TCGTGTGGCAGGATGTGTAT<br>R: ACCTGGTGTGAGTCTCAGAGG   |                                |
| Dusp1       | F: CATCCCTGTGGAGGACAACC<br>R: CAGCATCCTTGATGGAGTCTATG |                                |
| Dusp4       | F: TGCTTAAAGGTGGCTATGAGAGG                            |                                |

|                        |                                                                |                            |
|------------------------|----------------------------------------------------------------|----------------------------|
|                        | R: CTCATTGGTGCTGGGAGGTA                                        |                            |
| Dusp6                  | F: CGAGAATAGCAGCGACTGGA<br>R: TGAAGCCACCTTCCAGGTAGA            |                            |
| B-Actin                | F: TGTTACCAACTGGGACGACA<br>R: GGGGTGTTGAAGGTCTCAA              |                            |
| Gapdh                  | F: ACCACAGTCCATGCCATCAC<br>R: TCCACCACCCTGTTGCTGTA             |                            |
| mouseChIP<br>p21       | F: TACGGGTGCCGTACATCAG<br>R:AGCCTGGTCACCTTCTTACA               | (Schemmer et al.,<br>2013) |
| mouseChIP<br>Dusp6     | F: GCTGCAGCCTAGAAAGGATAG<br>R: GCGGGAACCTCAAGCGTAAA            |                            |
| Human-<br>TFAP2C       | F: GGCCAGCAACTGTGTAAAGA<br>R: GCAGTTCTGTATGTTTCGTCTCCAA        | (Schemmer et al.,<br>2013) |
| Human-<br>DUSP1        | F: GTACATCAAGTCCATCTGAC<br>R: GGTCTTCTAGGAGTAGACA              |                            |
| Human-<br>DUSP4        | F: TGGCAATAAGGACTCGGAATA<br>R:GGATCTGTGGGTTTCATCACT            |                            |
| Bisulfite H19<br>CTCF3 | F: GGGTTTTTTTGGTTATTGAATTTTAA<br>R: AATACACACATCTTACCACCCCTATA | (Fauque et al., 2010)      |

**Table S7:** shRNA oligonucleotide sequence

| Primer          | Sequence                                                                                                                                  |
|-----------------|-------------------------------------------------------------------------------------------------------------------------------------------|
| shRNA1<br>3'UTR | 5'GATCCCCGGGAAGAGTTTGTACCTATTCAAGAGATAGGTAACAAACTCT<br>TCCCTTTTAA<br>3'GGGCCCTTCTCAAACAATGGATAAGTTCTCTATCCATTGTTTGAGAAGGG<br>AAAAATTCGA   |
| shRNA 2<br>ORF  | 5'GATCCCCCAGAAGAGCCAAATCGAAATTCAAGAGATTTTCGATTTGGCTCT<br>TCTGTTTTTA<br>3'GGGGTCTTCTCGGTTTAGCTTTAAGTTCTCTAAAGCTAAACCGAGAAGAC<br>AAAAATTCGA |

## Supplementary References

- Choi, I., Carey, T. S., Wilson, C. A. and Knott, J. G.** (2012). Transcription factor AP-2gamma is a core regulator of tight junction biogenesis and cavity formation during mouse early embryogenesis. *Development*.
- Fauque, P., Ripoche, M. A., Tost, J., Journot, L., Gabory, A., Busato, F., Le Digarcher, A., Mondon, F., Gut, I., Jouannet, P. et al.** (2010). Modulation of imprinted gene network in placenta results in normal development of in vitro manipulated mouse embryos. *Hum Mol Genet* **19**, 1779-90.
- Jensen, L. J., Kuhn, M., Stark, M., Chaffron, S., Creevey, C., Muller, J., Doerks, T., Julien, P., Roth, A., Simonovic, M. et al.** (2009). STRING 8--a global view on proteins and their functional interactions in 630 organisms. *Nucleic Acids Res* **37**, D412-6.
- Jo, J. O., Kim, S. R., Bae, M. K., Kang, Y. J., Ock, M. S., Kleinman, H. K. and Cha, H. J.** (2010). Thymosin beta4 induces the expression of vascular endothelial growth factor (VEGF) in a hypoxia-inducible factor (HIF)-1alpha-dependent manner. *Biochim Biophys Acta* **1803**, 1244-51.
- Kuckenberger, P., Buhl, S., Woynecki, T., van Furden, B., Tolkunova, E., Seiffe, F., Moser, M., Tomilin, A., Winterhager, E. and Schorle, H.** (2010). The transcription factor TCFAP2C/AP-2gamma cooperates with CDX2 to maintain trophoblast formation. *Mol Cell Biol* **30**, 3310-20.
- Loots, G. G. and Ovcharenko, I.** (2004). rVISTA 2.0: evolutionary analysis of transcription factor binding sites. *Nucleic Acids Res* **32**, W217-21.
- Mould, A., Morgan, M. A., Li, L., Bikoff, E. K. and Robertson, E. J.** (2012). Blimp1/Prdm1 governs terminal differentiation of endovascular trophoblast giant cells and defines multipotent progenitors in the developing placenta. *Genes Dev* **26**, 2063-74.
- Reichmann, J., Reddington, J. P., Best, D., Read, D., Ollinger, R., Meehan, R. R. and Adams, I. R.** (2013). The genome-defence gene Tex19.1 suppresses LINE-1 retrotransposons in the placenta and prevents intra-uterine growth retardation in mice. *Hum Mol Genet* **22**, 1791-806.
- Schemmer, J., Arauzo-Bravo, M. J., Haas, N., Schafer, S., Weber, S. N., Becker, A., Eckert, D., Zimmer, A., Nettersheim, D. and Schorle, H.** (2013). Transcription factor TFAP2C regulates major programs required for murine fetal germ cell maintenance and haploinsufficiency predisposes to teratomas in male mice. *PLoS One* **8**, e71113.
- Sferruzzi-Perri, A. N., Macpherson, A. M., Roberts, C. T. and Robertson, S. A.** (2009). Csf2 null mutation alters placental gene expression and trophoblast glycogen cell and giant cell abundance in mice. *Biol Reprod* **81**, 207-21.
- Villanueva, C. J., Waki, H., Godio, C., Nielsen, R., Chou, W. L., Vargas, L., Wroblewski, K., Schmedt, C., Chao, L. C., Boyadjian, R. et al.** (2011). TLE3 is a dual-function transcriptional coregulator of adipogenesis. *Cell Metab* **13**, 413-27.
- Ward-Farley, D., Donaldson, S. L., Comes, O., Zuberi, K., Badrawi, R., Chao, P., Franz, M., Grouios, C., Kazi, F., Lopes, C. T. et al.** (2010). The GeneMANIA prediction server: biological network integration for gene prioritization and predicting gene function. *Nucleic Acids Res* **38**, W214-20.
